# Supplementary material for: Molecular Tumor Subtypes of HPV-Positive Head and Neck Cancers: Biological Characteristics and Implications for Clinical Outcomes
Source: MDPI journal article supplement (doi:10.3390/cancers13112721), 2021-05-31
Supplement: s1 [file s1]

Review

# Molecular Tumor Subtypes of HPV-Positive Head and Neck Cancers: Biological Characteristics and Implications for Clinical Outcomes

Tingting Qin <sup>1,2,†</sup>, Shiting Li <sup>1,†</sup>, Leanne E. Henry <sup>1,3</sup>, Siyu Liu <sup>1</sup> and Maureen A. Sartor <sup>1,2,\*</sup>

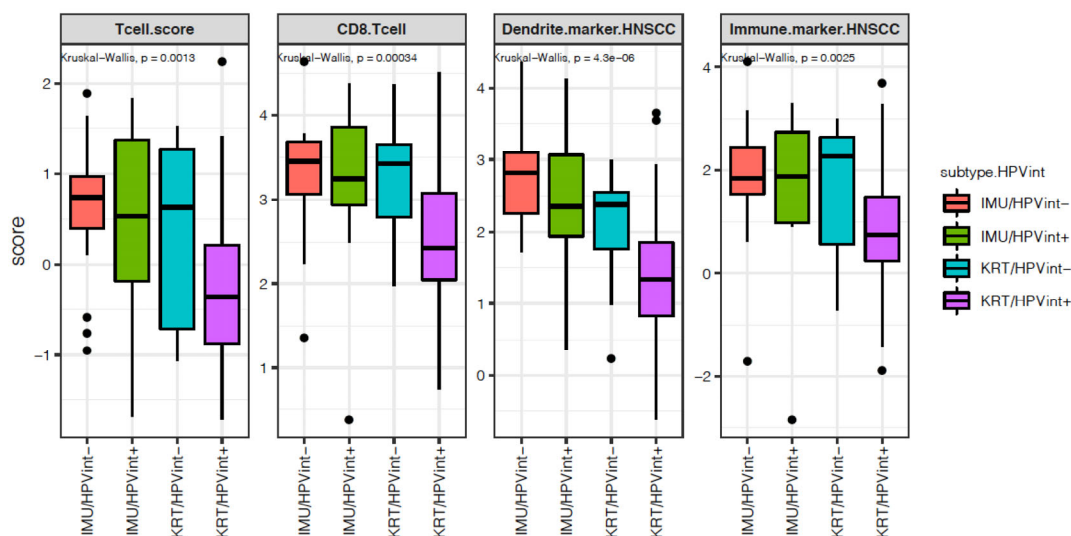

**Supplementary Figure S1.** Comparisons of pathway scores of T cell differentiation (Tcell.score), CD8 T cell (CD8.Tcell), Dendrite cell marker for head neck cancer (Dendrite.marker.HNSCC) and Immune Marker for Head Neck Cancer (Immune.marker.HNSCC) among the 84 HPV(+) HNSCC samples from combined TCGA and UM cohorts, which were stratified by IMU/KRT subtypes and HPV integration status.

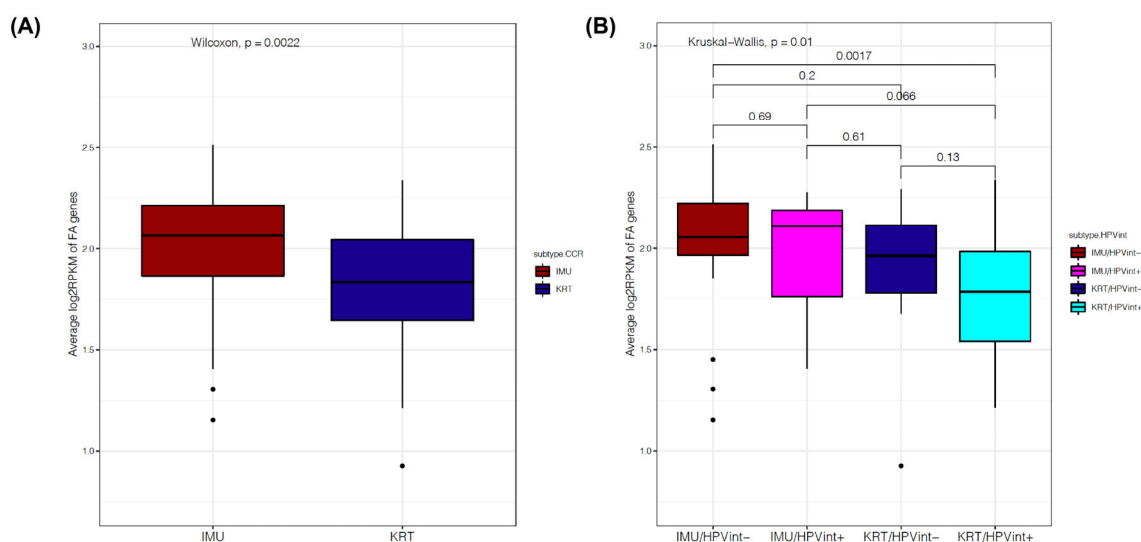

**Supplementary Figure S2.** Comparisons of average fanconi anemia (FA) genes among the 84 HPV(+) HNSCC samples from combined TCGA and UM cohorts between (A) IMU/KRT subtypes and (B) IMU/KRT subtypes and HPV integration status.
